# Supplementary material for: Development and Optimization of Air-Electrodes for Rechargeable Zn–Air Batteries
Source: MDPI journal article supplement (doi:10.3390/catal13101319), 2023-09-23
Supplement: s1 [file s1]

# Development and Optimization of Air-electrodes for Rechargeable Zn-Air Batteries

Khair Un Nisa <sup>1</sup>, Williane da Silva Freitas <sup>1,\*</sup>, Jorge Montero Rodriguez <sup>1</sup>, Alessandra D'Epifanio and Barbara Mecheri <sup>1,\*</sup>

<sup>1</sup> Department of Chemical Sciences and Technologies, University of Rome Tor Vergata, Via della Ricerca Scientifica, 00133 Rome, Italy.

\* Correspondence: williane.freitas@uniroma2.it (W.F.), barbara.mecheri@uniroma2.it (B.M.)

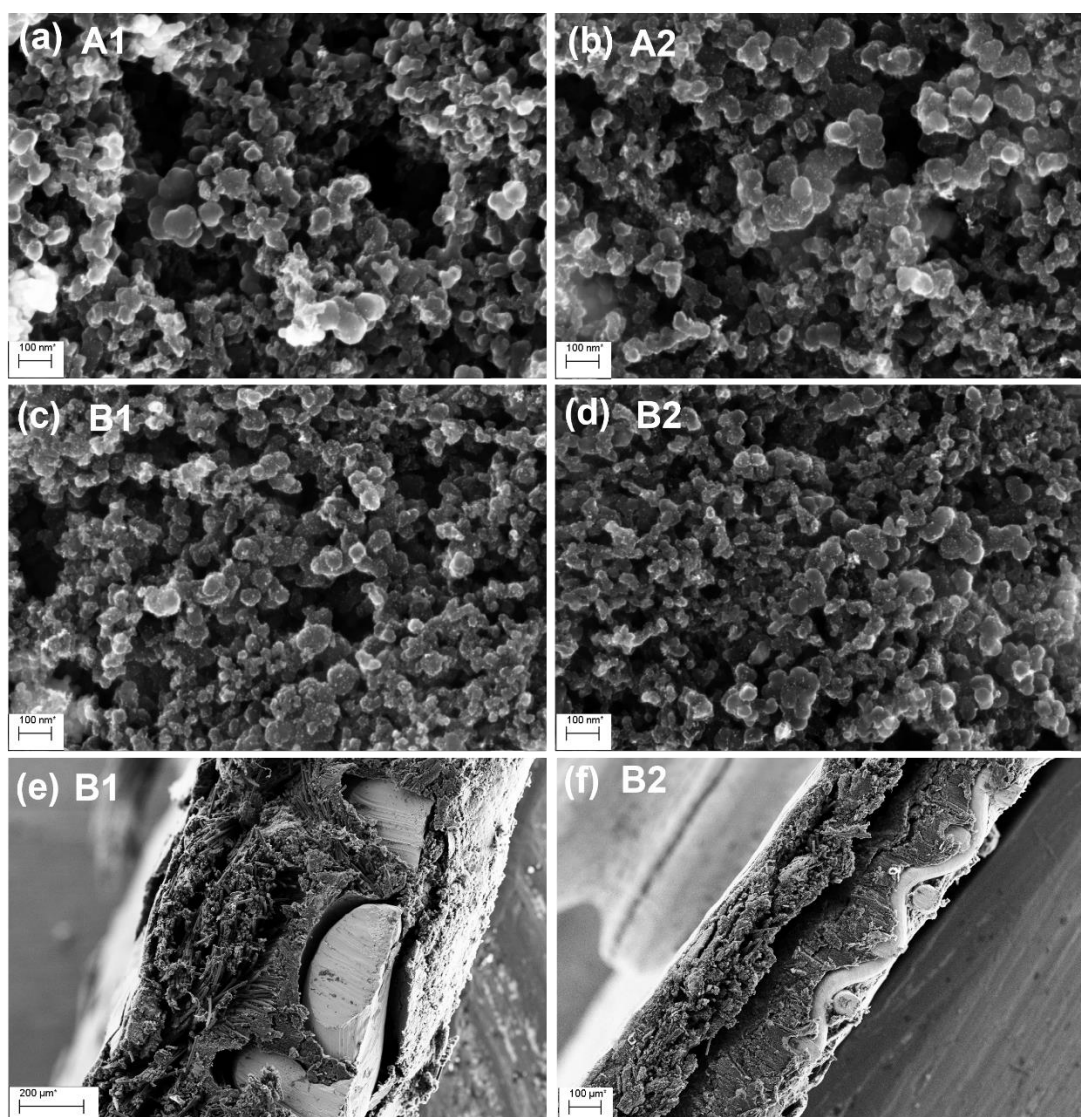

**Figure S1.** SEM micrographs at a 200 kX magnification for the catalyst layer surface of (a) A1 (b) A2, (c) B1 and (d) B2, and cross section micrographs at a 200 X magnification for (e) B1 and (f) B2 cathodes.

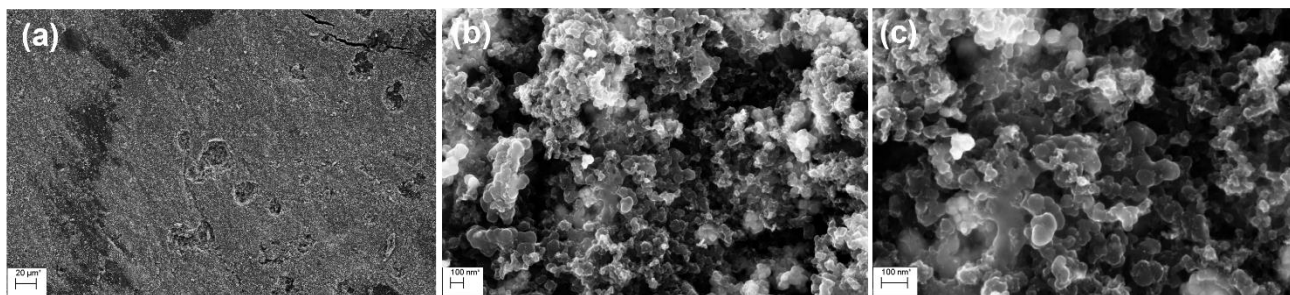

**Figure S2.** SEM micrographs for the catalyst layer surface of B2 cathode after charge and discharge cycling at an **(a)** 800 X, **(b)** 100 kX and **(c)** 200 kX magnification.
