# Supplementary material for: Development and Optimization of Air-Electrodes for Rechargeable Zn–Air Batteries
Source: MDPI journal article supplement (doi:10.3390/catal13101319), 2023-09-23
Supplement: s1 [file s1]

Archive with 1 entries (1 files):
- catalysts-2622717-supplementary.pdf
